# Supplementary material for: Olfactory proteotyping: towards the enlightenment of the neurodegeneration
Source: PubMed Central journal article supplement — Neural Regen Res. 2019 Jun;14(6):979–81. doi: 10.4103/1673-5374.249220 (PMC6404500; doi:10.4103/1673-5374.249220), 2019-06
Supplement: NRR-14-979_Suppl3.pdf [file NRR-14-979_Suppl3.pdf]

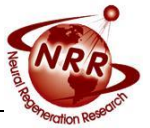

## OPEN PEER REVIEW REPORT 2

**Name of journal:** Neural Regeneration Research

**Manuscript NO:** NRR-D-18-00765

**Title:** Olfactory proteotyping: Towards the enlightenment of the neurodegeneration

**Reviewer's Name:** Cristina Maccallini

**Reviewer's country:** ITALY

**Date sent for review:** 2018-11-05

**Date reviewed:** 2018-11-15

**Review time:** 10 Days

### COMMENTS TO AUTHORS

Overall this is a good review, although it is too short. First of all I suggest to write an introduction, explaining the possible mechanisms of the olfactory dysfunction and how they are involved in neurodegeneration; which neurotransmitters are involved; how methods to detect olfactory dysfunction could be useful for neurodegeneration early diagnosis.

On the contrary, conclusions are too long, I suggest to summarize this paragraph.
